# Supplementary material for: OXA1L mutations cause mitochondrial encephalopathy and a combined oxidative phosphorylation defect
Source: PubMed Central journal article supplement (PMC6220311; doi:10.15252/emmm.201809060), 2018-09-10
Supplement: EMMM-10-e9060-s001.pdf [file EMMM-10-e9060-s001.pdf]

# Appendix

## Table of Contents

|                                                                            |          |
|----------------------------------------------------------------------------|----------|
| <i>Table S1: Transcript Summary of OXA1L Isoforms .....</i>                | <i>2</i> |
| <i>Table S2: Identification of OXA1L homologues using HHPred.....</i>      | <i>3</i> |
| <i>Figure S1: Bayesian phylogenetic analysis of OXA1L homologues. ....</i> | <i>4</i> |
| <i>References.....</i>                                                     | <i>5</i> |

|           |                   |      |            |                 |          | Median Gene Expression (TPM-Transcripts Per Million) |                   |                   |                 |                     |                                     |                                |                           |                             |
|-----------|-------------------|------|------------|-----------------|----------|------------------------------------------------------|-------------------|-------------------|-----------------|---------------------|-------------------------------------|--------------------------------|---------------------------|-----------------------------|
|           |                   |      |            |                 |          | Artery                                               |                   | Brain             |                 |                     | Heart                               |                                |                           |                             |
|           |                   |      |            |                 |          | Aorta<br>(299)                                       | Coronary<br>(173) | Amygdala<br>(100) | Cortex<br>(158) | Spinal Cord<br>(91) | Transformed<br>fibroblasts<br>(343) | Arterial<br>Appendage<br>(297) | Left<br>Verticle<br>(303) | Skeletal<br>Muscle<br>(564) |
| Name      | Transcript ID     | bp   | Protein    | Biotype         | UniProt  |                                                      |                   |                   |                 |                     |                                     |                                |                           |                             |
| OXA1L-213 | ENST00000612549.4 | 2971 | 495aa      | Protein coding  | J3KNA0   | 119                                                  | 125.2             | 28.52             | 44.94           | 47.04               | 161.8                               | 87.48                          | 97.36                     | 147                         |
| OXA1L-201 | ENST00000285848.9 | 1719 | 495aa      | Protein coding  | J3KNA0   | 0                                                    | 0                 | 0                 | 0               | 0                   | 0                                   | 0                              | 0                         | 0                           |
| OXA1L-202 | ENST00000358043.5 | 1750 | 419aa      | Protein coding  | Q15070-2 | 0.72                                                 | 0.77              | 0.1               | 0.23            | 0.22                | 0.72                                | 0.4                            | 0.19                      | 0.21                        |
| OXA1L-212 | ENST00000604262.5 | 1571 | 435aa      | Protein coding  | S4R3Q9   | 59.23                                                | 61.62             | 17.04             | 26.35           | 24.59               | 91.73                               | 54.97                          | 66.09                     | 104.5                       |
| OXA1L-203 | ENST00000412791.5 | 1440 | 408aa      | Protein coding  | E7EVY0   | 0                                                    | 0                 | 0                 | 0               | 0                   | 0                                   | 0                              | 0                         | 0                           |
| OXA1L-204 | ENST00000431881.6 | 889  | 112aa      | Protein coding  | C9JC63   | 0.35                                                 | 0.36              | 0                 | 0.08            | 0                   | 0.26                                | 0.15                           | 0.08                      | 0.26                        |
| OXA1L-205 | ENST00000442110.5 | 691  | 82aa       | NMD             | H7BZE6   | -                                                    | -                 | -                 | -               | -                   | -                                   | -                              | -                         | -                           |
| OXA1L-209 | ENST00000495424.5 | 1679 | No protein | Retained intron | -        | 0                                                    | 0                 | 0                 | 0               | 0                   | 0                                   | 0                              | 0                         | 0                           |
| OXA1L-207 | ENST00000481218.1 | 1596 | No protein | Retained intron | -        | 15.32                                                | 17.18             | 3.87              | 7.17            | 7.39                | 12.11                               | 7.47                           | 5.59                      | 3.61                        |
| OXA1L-208 | ENST00000483939.6 | 1224 | No protein | Retained intron | -        | 3.44                                                 | 3.67              | 0.51              | 1.67            | 1.11                | 5.29                                | 1.59                           | 1.23                      | 0.88                        |
| OXA1L-206 | ENST00000473744.5 | 824  | No protein | Retained intron | -        | 0.18                                                 | 0                 | 0                 | 0               | 0                   | 0.19                                | 0.07                           | 0                         | 0.23                        |
| OXA1L-210 | ENST00000556473.1 | 593  | No protein | Retained intron | -        | -                                                    | -                 | -                 | -               | -                   | -                                   | -                              | -                         | -                           |
| OXA1L-211 | ENST00000557299.5 | 538  | No protein | Retained intron | -        | 1.53                                                 | 1.33              | 0.1               | 0.26            | 0.36                | 1.61                                | 0.69                           | 0.42                      | 0.32                        |

**Table S1: Transcript Summary of OXA1L Isoforms**

Transcript Summary of OXA1L Isoforms including the Median gene Expression in transcripts per million (TPM) in selected tissues. Expression data was obtained from GTEx Portal (<https://www.gtexportal.org/home/>). All other data was obtained from Ensembl v.92.

|        | No | Species | Gene                          | Hit            | Prob | E-value   | P-value   | Score |
|--------|----|---------|-------------------------------|----------------|------|-----------|-----------|-------|
| OXAL1  | 1  | HS      | OXA1L                         | NP_005006.3    | 100  | 7.00E-147 | 4.00E-152 | 832.8 |
|        | 2  | DM      | CG6404, isoform A             | NP_729634.1    | 100  | 7.10E-99  | 5.00E-104 | 569.4 |
|        | 3  | DM      | CG6404, isoform B             | NP_648417.1    | 100  | 7.10E-99  | 5.00E-104 | 569.4 |
|        | 4  | SC      | OXA1                          | NP_011081.1    | 100  | 6.20E-80  | 4.20E-85  | 465.6 |
|        | 5  | HS      | COX18 isoform 1               | NP_001284661.1 | 100  | 8.00E-61  | 5.40E-66  | 360.8 |
|        | 6  | HS      | COX18 isoform 2               | NP_776188.1    | 100  | 1.30E-60  | 8.90E-66  | 359.6 |
|        | 7  | DM      | CG4942                        | NP_648286.1    | 100  | 4.40E-59  | 3.00E-64  | 351.3 |
|        | 8  | HS      | PREDICTED: COX18 isoformX2    | XP_016863534.1 | 100  | 3.70E-53  | 2.50E-58  | 318.8 |
|        | 9  | HS      | PREDICTED: COX18 isoformX1    | XP_005265737.1 | 100  | 1.90E-53  | 1.30E-58  | 320.4 |
|        | 10 | SC      | COX18                         | NP_011576.1    | 100  | 2.80E-48  | 1.90E-53  | 292   |
|        | 11 | HS      | COX18 isoform 4               | NP_001287658.1 | 100  | 7.80E-47  | 5.30E-52  | 284.1 |
|        | 12 | HS      | COX18 isoform 3               | NP_001284662.1 | 100  | 1.40E-35  | 9.70E-41  | 222.4 |
|        | 13 | HS      | PREDICTED: COX18 isoformX5    | XP_011530180.1 | 100  | 1.60E-34  | 1.10E-39  | 216.7 |
|        | 14 | MJ      | DUF106                        | WP_010869981.1 | 97.6 | 0.0024    | 1.70E-08  | 45.7  |
| DUF106 | 1  | HS      | OXA1L                         | NP_005006.3    | 99.9 | 3.30E-25  | 2.20E-30  | 165.6 |
|        | 2  | DM      | CG6404, isoform B             | NP_648417.1    | 99.9 | 3.80E-25  | 2.60E-30  | 165.2 |
|        | 3  | DM      | CG6404, isoform A             | NP_729634.1    | 99.9 | 3.80E-25  | 2.60E-30  | 165.2 |
|        | 4  | SC      | OXA1                          | NP_011081.1    | 99.9 | 1.30E-23  | 8.90E-29  | 156.8 |
|        | 5  | HS      | PREDICTED: COX18 isoformX2    | XP_016863534.1 | 99.9 | 3.50E-22  | 2.40E-27  | 148.9 |
|        | 6  | HS      | COX18 isoform 2               | NP_776188.1    | 99.9 | 5.30E-22  | 3.60E-27  | 148   |
|        | 7  | HS      | PREDICTED: COX18 isoformX1    | XP_005265737.1 | 99.9 | 4.00E-22  | 2.80E-27  | 148.6 |
|        | 8  | HS      | COX18 isoform 1               | NP_001284661.1 | 99.9 | 8.20E-22  | 5.60E-27  | 146.9 |
|        | 9  | HS      | TMCO1 isoform 1               | NP_061899.2    | 99.9 | 1.00E-21  | 7.10E-27  | 146.4 |
|        | 10 | DM      | Uncharacterized: Dmel_CG10470 | NP_609936.1    | 99.9 | 1.50E-21  | 1.00E-26  | 145.5 |
|        | 11 | HS      | TMCO1 isoform 2               | NP_001243093.1 | 99.8 | 4.30E-21  | 3.00E-26  | 143   |
|        | 12 | HS      | TMCO1 isoform 3               | NP_001243094.1 | 99.8 | 4.50E-21  | 3.10E-26  | 142.8 |
|        | 13 | DM      | CG4942                        | NP_648286.1    | 99.8 | 1.60E-20  | 1.10E-25  | 139.9 |
|        | 14 | SC      | COX18                         | NP_011576.1    | 99.8 | 1.60E-18  | 1.10E-23  | 128.9 |
|        | 15 | HS      | COX18 isoform 4               | NP_001287658.1 | 99.4 | 3.50E-13  | 2.40E-18  | 99.6  |
|        | 16 | SC      | EMC3P                         | NP_012715.3    | 99.2 | 1.60E-11  | 1.10E-16  | 90.5  |
|        | 17 | DM      | EMC3P                         | NP_609444.1    | 99.2 | 3.60E-11  | 2.50E-16  | 88.6  |
|        | 18 | HS      | EMC3P isoform X1              | XP_005265378.1 | 99.1 | 2.60E-11  | 1.80E-16  | 89.3  |
|        | 19 | HS      | EMC3P                         | NP_060917.1    | 99.1 | 3.10E-11  | 2.20E-16  | 88.9  |
|        | 20 | HS      | COX18 isoform 3               | NP_001284662.1 | 98.6 | 4.00E-08  | 2.70E-13  | 71.9  |
|        | 21 | HS      | PREDICTED: COX18 isoformX5    | XP_011530180.1 | 98.5 | 6.10E-08  | 4.20E-13  | 70.9  |
|        | 22 | HS      | WRB isoform 1                 | NP_004618.2    | 97.6 | 0.002     | 1.40E-08  | 46    |
|        | 23 | HS      | WRB isoform 2                 | NP_001139690.1 | 97.3 | 0.0018    | 1.20E-08  | 46.3  |
|        | 24 | SC      | GET1                          | NP_011495.1    | 97.3 | 0.0091    | 6.20E-08  | 42.5  |

**Table S2: Identification of OXA1L homologues using HHPred**

HHpred analysis (Zimmermann *et al*, 2017) of . Proteomes for Human (HS), *D. melanogaster* (DM), *S. cerevisiae* (SC) and *M. Jannaschii* were searched for OXA1 (NP\_005006.3) and DUF106 (WP\_010869981.1) using the default 'global' alignment settings, repeating in part the analysis of Anghel *et al.*, (Anghel *et al*, 2017). Hits with probability score greater than 97 were reported. The E-value, P-value and Score for each hit is also reported.



## References

- Anghel SA, McGilvray PT, Hegde RS & Keenan RJ (2017) Identification of Oxa1 Homologs Operating in the Eukaryotic Endoplasmic Reticulum. *Cell Rep* **21**: 3708–3716
- Drummond AJ & Rambaut A (2007) BEAST: Bayesian evolutionary analysis by sampling trees. *BMC Evol. Biol.* **7**: 214
- Katoh K & Standley DM (2013) MAFFT multiple sequence alignment software version 7: improvements in performance and usability. *Mol. Biol. Evol.* **30**: 772–780
- Landan G & Graur D (2008) Local reliability measures from sets of co-optimal multiple sequence alignments. *Pac Symp Biocomput*: 15–24
- Sela I, Ashkenazy H, Katoh K & Pupko T (2015) GUIDANCE2: accurate detection of unreliable alignment regions accounting for the uncertainty of multiple parameters. *Nucleic Acids Res.* **43**: W7–14
- Zimmermann L, Stephens A, Nam S-Z, Rau D, Kübler J, Lozajic M, Gabler F, Söding J, Lupas AN & Alva V (2017) A Completely Reimplemented MPI Bioinformatics Toolkit with a New HHpred Server at its Core. *J Mol Biol*
