# Supplementary material for: OXA1L mutations cause mitochondrial encephalopathy and a combined oxidative phosphorylation defect
Source: PubMed Central journal article supplement (PMC6220311; doi:10.15252/emmm.201809060), 2018-09-10

Figure 4B Source Data

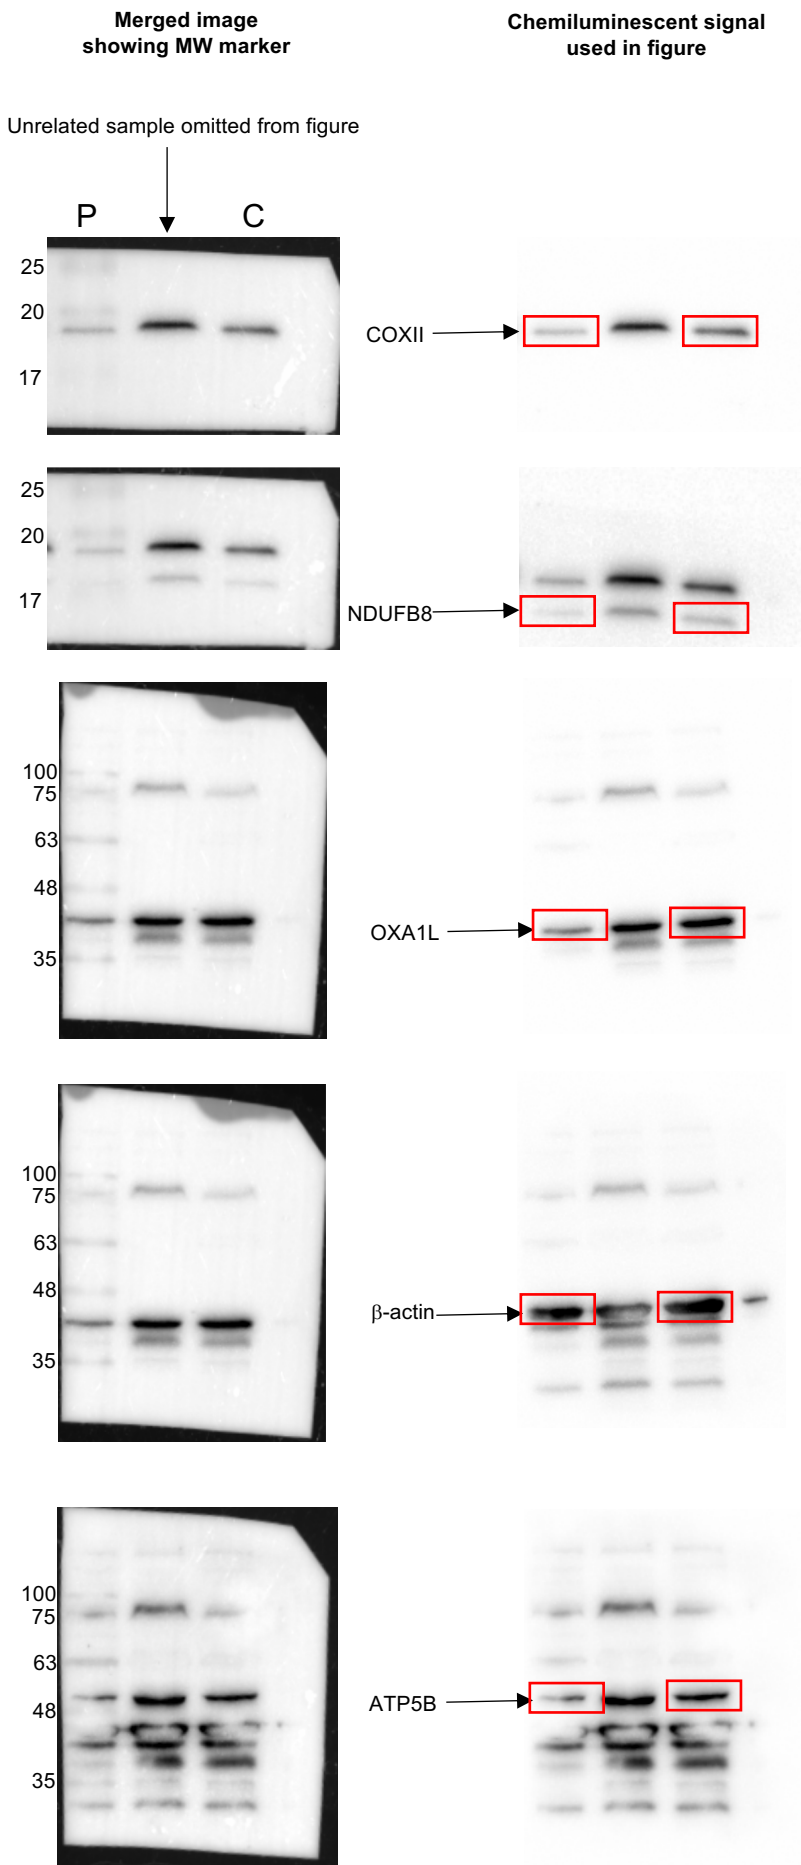

Figure 4B Source Data

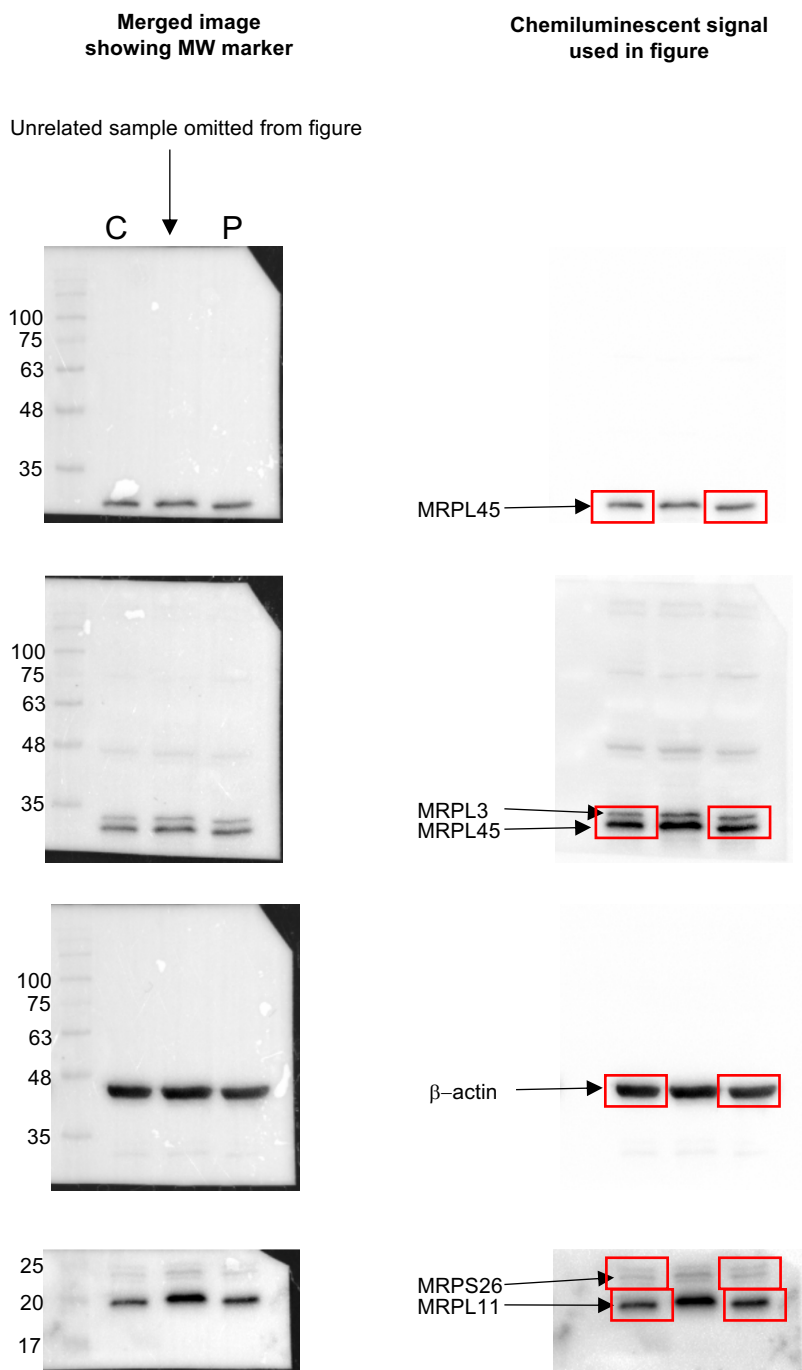

Supplement: EMMM-10-e9060-s006.pdf [file EMMM-10-e9060-s006.pdf]
